# Supplementary material
Source: publisher figshare collection journal article supplement (https://tandf.figshare.com/articles/dataset/_/12228398)
Supplement: Supplementary file 1 [file 1]

Table 1. Non-participant analysis.

|                                              | Combined cohorts            |                        |         | HeSVA                      |                        | ESTER                     |                       | FMBR                        |                        |
|----------------------------------------------|-----------------------------|------------------------|---------|----------------------------|------------------------|---------------------------|-----------------------|-----------------------------|------------------------|
|                                              | Non-participants<br>n = 175 | Participants<br>n = 79 | p-value | Non-participants<br>n = 40 | Participants<br>n = 22 | Non-participants<br>n = 9 | Participants<br>n = 6 | Non-participants<br>n = 126 | Participants<br>n = 51 |
| All invited, n = 254                         |                             |                        |         |                            |                        |                           |                       |                             |                        |
| Age in years, mean (SD)†                     | 27.0 (3.2)                  | 27.5 (3.1)             | .30     | 32.2 (2.5)                 | 31.9 (2.3)             | 25.8 (1.0)                | 25.8 (0.4)            | 25.5 (1.1)                  | 25.8 (1.1)             |
| Male, n (%)                                  | 103 (58.9%)                 | 37 (46.8%)             | .07     | 22 (55.0%)                 | 7 (31.8%)              | 5 (55.6%)                 | 1 (16.7%)             | 76 (60.3%)                  | 29 (56.9%)             |
| Birth weight in grams, mean (SD)             | 1143 (242)                  | 1148 (225)             | .86     | 1090 (233)                 | 1132 (180)             | 1310 (185)                | 1130 (316)            | 1147 (244)                  | 1157 (235)             |
| Gestational age in weeks, mean (SD)          | 29.2 (2.6)                  | 29.6 (2.5)             | .29     | 28.7 (2.4)                 | 29.3 (2.2)             | 29.9 (2.0)                | 30.3 (4.6)            | 29.4 (2.7)                  | 29.7 (2.4)             |
| Relative birth weight in SD units, mean (SD) | -1.3 (1.6)                  | -1.5 (1.6)             | .41     | -1.2 (1.5)                 | -1.2 (1.5)             | -0.85 (1.8)               | -2.2 (1.8)            | -1.3 (1.6)                  | -1.5 (1.7)             |
| Small for gestational age, n (%)             | 61 (34.9%)                  | 31 (39.2%)             | .50     | 14 (35.0%)                 | 7 (31.8%)              | 3 (33.3%)                 | 3 (50.0%)             | 44 (34.9%)                  | 21 (41.2%)             |
| Mother's age in years, mean (SD)             | 29.4 (5.4)                  | 29.3 (5.1)             | .86     | 29.1 (5.3)                 | 28.5 (3.3)             | 31.8 (4.8)                | 31.0 (5.8)            | 29.4 (5.5)                  | 29.5 (5.6)             |
| Maternal smoking during pregnancy, n (%)*    | 39 (22.3%)                  | 7 (8.9%)               | .009    | 9 (25.0%)                  | 3 (13.6%)              | 2 (22.2%)                 | 1 (16.7%)             | 28 (22.6%)                  | 3 (6.1%)               |
| Multiple pregnancy, n (%)                    | 30 (17.1%)                  | 9 (11.4%)              | .24     | 6 (15.0%)                  | 3 (13.6%)              | 0 (0.0%)                  | 0 (0.0%)              | 24 (19.0%)                  | 6 (11.8%)              |
| Firstborn, n (%)                             | 63 (36.0%)                  | 30 (38.0%)             | .76     | 10 (25.0%)                 | 6 (27.3%)              | 1 (11.1%)                 | 2 (33.3%)             | 52 (41.3%)                  | 22 (43.1%)             |
| Mother's education level                     |                             |                        | .06     |                            |                        |                           |                       |                             |                        |
| Lower secondary or less or unknown           | 40 (22.9%)                  | 9 (11.4%)              |         | 11 (27.5%)                 | 2 (9.1%)               | 2 (22.2%)                 | 0 (0.0%)              | 27 (21.4%)                  | 7 (13.7%)              |
| Upper secondary                              | 62 (35.4%)                  | 27 (34.2%)             |         | 12 (30.0%)                 | 7 (31.8%)              | 3 (33.3%)                 | 4 (66.7%)             | 47 (37.3%)                  | 16 (31.4%)             |
| Tertiary                                     | 73 (41.7%)                  | 43 (54.4%)             |         | 17 (42.5%)                 | 13 (59.1%)             | 4 (44.4%)                 | 2 (33.3%)             | 52 (41.3%)                  | 28 (54.9%)             |
| Father's education level                     |                             |                        | .004    |                            |                        |                           |                       |                             |                        |
| Lower secondary or less or unknown           | 54 (30.9%)                  | 9 (11.4%)              |         | 13 (32.5%)                 | 2 (9.1%)               | 3 (33.3%)                 | 0 (0.0%)              | 38 (30.2%)                  | 7 (13.7%)              |
| Upper secondary                              | 62 (35.4%)                  | 36 (45.6%)             |         | 14 (35.0%)                 | 6 (27.3%)              | 4 (44.4%)                 | 5 (83.3%)             | 44 (34.9%)                  | 25 (49.0%)             |
| Tertiary                                     | 59 (33.7%)                  | 34 (43.0%)             |         | 13 (32.5%)                 | 14 (63.6%)             | 2 (22.2%)                 | 1 (16.7%)             | 44 (34.9%)                  | 19 (37.3%)             |

Statistical significance was tested with independent samples t-tests and  $\chi^2$ .

†at date 1.1.2015. \*missing n = 8 (4 HeSVA non-participants, 2 FMBR non-participants, 2 FMBR-participants)

ESTER, ESTER Preterm Birth Study; FMBR, Finnish Medical Birth Registry; HeSVA, Helsinki Study of VLBW Adults; SD, standard deviation; VLBW, very low birth weight.
