# Supplementary material
Source: publisher figshare collection journal article supplement (https://tandf.figshare.com/articles/dataset/_/12228398)
Supplement: Supplementary file 2 [file 1]

Archive with 2 entries (2 files):
- Figure_1._Map_of_recruitment_areas._Supplemental_file.tif
- ICBI_1754847_Table.pdf
