# Supplementary material
Source: publisher figshare collection journal article supplement (https://tandf.figshare.com/articles/dataset/_/12228398)

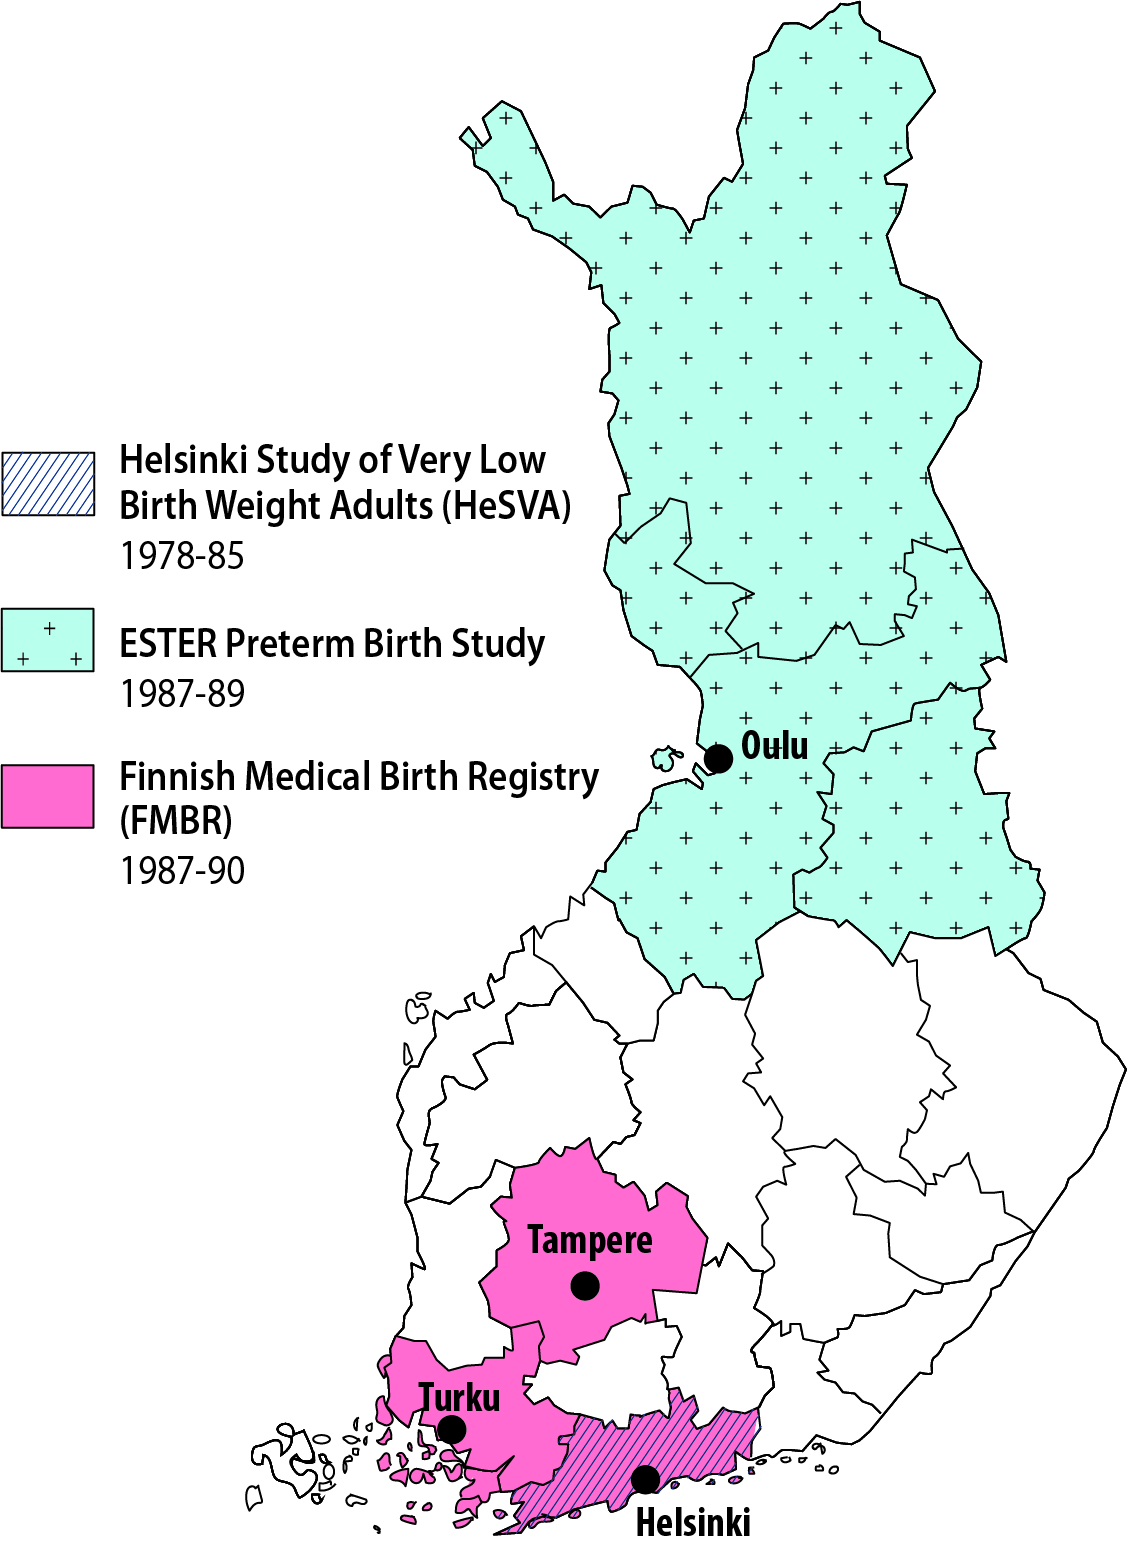

Supplement: Supplementary file 2 [file 1 › Figure_1._Map_of_recruitment_areas._Supplemental_file.tif]
